# Supplementary material for: The Effectiveness of Interventions for Increasing COVID-19 Vaccine Uptake: A Systematic Review
Source: Vaccines (Basel). 2022 Mar 3;10(3):386. doi: 10.3390/vaccines10030386 (PMC8949230; doi:10.3390/vaccines10030386)
Supplement: Supplementary file 1 [file vaccines-10-00386-s001.zip]

Archive with 4 entries (4 files):
- vaccines-1584862- supplementary Table S1-PRISMA 2020 checklist.pdf
- vaccines-1584862- supplementary Table S3-Table of included studies.xlsx
- vaccines-1584862-supplementary Table S2-Search terms.xlsx
- vaccines-1584862-supplementary Table S4-Risk of bias.xlsx
