# Supplementary material for: The Effectiveness of Interventions for Increasing COVID-19 Vaccine Uptake: A Systematic Review
Source: Vaccines (Basel). 2022 Mar 3;10(3):386. doi: 10.3390/vaccines10030386 (PMC8949230; doi:10.3390/vaccines10030386)
Supplement: Supplementary file 1 [file vaccines-10-00386-s001.zip › vaccines-1584862- supplementary Table S3-Table of included studies.xlsx]

## Sheet: Included Studies
Paper #	Study #	Author	Year	DOI	Report type	Title	Design	Participants	Participant selection method	Time period	Location	Intervention Type	Intervention description	Comparison	Intention or Behaviour?	Vaccine uptake measure	Effectiveness	Risk of bias assessment
1	1	Bateman et al	2021	10.1016/S2665-9913(21)00148-X	Peer-reviewed	COVID-19 vaccination advice via SMS-based video to improve vaccination uncertainty in at-risk groups	Online Cross-sectional	n=661 (patients with an autoimmune rheumatic disease)	Patients with a valid mobile phone number on the authors system	December 21st 2020 - January 4th 2021	UK	Communications - delivery: Video	8-minute interactive web-based educational video including information on current licensed COVID-19 vaccines, vaccination scheduling, safety, FAQ and links to resources. Sent to patients via text message	None	Intention	Likelihood of seeking the vaccine	Positive effect	Poor
2	2	Witus & Larson	2021	10.1101/2021.03.26.21254433	Pre-print	A randomized controlled trial of a video intervention shows evidence of increasing COVID-19 intention	Online RCT	n=1,632 (general population)	Online recruitment platform (Amazon Mechanical Turk)	February 25-26th 2021	US	Communications - delivery: Video	8-minute video discussing how the mRNA vaccine platforms work, highlighting efficacy, rarity of serious side effects and altruism of vaccination Same information presented in different formats 1. male narrator 2. female narrator 3. blog post with transcript	No information	Intention	Vaccination intention	1. Male narrator - positive effect 2. Female narrator - no effect 3. Blog post - no effect	Fair
3	3	Chen et al	2021	10.1080/10410236.2021.1876814	Peer-reviewed	Do messages matter? Investigating the combined effects of framing, outcome uncertainty, and number format on COVID-19 vaccination attitudes and intention	Online RCT	n=413 (general population)	Snowball sampling through a large national nonprofit health organisation in China	May 28th - June 24th 2020	China	Communications - presentation: Framing, Numerical Format Communications - content: Effectiveness and safety	Chinese news article describing the origin, history, severity and prevalence of COVID-19 and announcing that one Chinese vaccine has completed phase 1 clinical and had promising results, with an expert statement. It manipulated: Certainty: 80% effectiveness vs 20% effectiness Number: 80% & 20% vs 86 out of108, 22 out of 108 Framing: expert statement - "by [not] getting vaccinated, people will be …	No additional comparison (8 types of news article with 3 manipulations)	Intention	Vaccine attitudes and intention	No effects	Good
4	4	Berliner-Senderey et al	2021	10.2139/ssrn.3852345	Pre-print	Encouraging Uptake of the COVID-19 vaccine through behaviorally informed interventions: national-real world evidence from Israel	Field RCT	n=768,404 (unvaccinated over 16s)	Members of Clalit Health Services	February 16th-23rd 2021	Israel	Communications - delivery: Reminders Communications - content: Benefits of vaccination, Effectiveness and safety, Social norms	Baseline text message reminder followed by one of two reminders: Personal benefit: in a large-scale research study conducted by the Clalit research institute, the vaccine was found to be effective and reduce 94% of COVID-19 related morbidity! The vaccine is reserved for you today, at the [closest centre] until 21:00. If you'd prefer, you can schedule an appointment here. Social benefit: It's time…	No additional comparison (personal vs social benefit message)	Behaviour	Whether or not the individual received the COVID-19 vaccine within the following week	1. Pre-post message - positive effect 2. Personal benefit - more effective than social benefit	Fair
5	5	Yuen et al	2021	10.1101/2021.06.05.21258416	Pre-print	When to be vaccinated? What to consider? Modelling decision-making and time preference for COVID-19 vaccine through a conjoint experiment approach	Online Cross-sectional	n=2,733 (adults above 18)	Previous waves of a panel survey and snowballing of existing respondents and the networks of NGOs	January 22nd-28th 2021	Hong Kong	Policy: Cost Communications - content: Effectiveness and safety Delivery: Waiting time	Respondents were presented with two vaccine profiles, each characterised by 6 attributes: 1) vaccine cost/subsidy (free, HKD400, 700, free w/ HKD 400/700 subside) 2) vaccine efficacy (50, 70,90,95%) 3) protection scheme to compensate for severe side-effects (none, medical insurance, insurance + extra living subsidy) 4) likelihood of mild side-effects (e.g. swelling, fever, chills and/or tiredness…	No additional comparison (varied vaccine characteristics)	Intention	Forced choice from of two vaccine profiles	1. Cost and subsidy - negative effect 2. 95% vs 75%/50% efficacy - positive effect 3. Providing medical insurance - positive effect; Extra living subsidy - equivalent to providing medical insurance 4. Increasing likelihood of mild side effects - negative effect 5. Increasing likelihood of severe side effects - negative effect 6. Wait time of one month - negative effect	Good
6	6	Thorpe et al	2021	10.1101/2021.06.25.21259519	Pre-print	Communicating about COVID-19 vaccine development and safety	Online RCT	n=1,075 (general population)	Online recruitment platform (Qualtrics Online Panels)	March 8th-23rd 2021	US	Communications - content: Benefits of vaccination, Effectiveness and safety and Vaccine development	Factbox message: risks of getting a vaccine vs getting COVID-19 Timeline message: development of COVID-19 vaccines	No message	Intention	Vaccine intention	No effects	Good
7	7	Strickland et al	2021	10.1101/2021.01.20.21250195	Pre-print	Integrating operant and cognitive behavioural economics to inform infectious disease response: Prevention, testing, and vaccination in the COVID-19 pandemic	Online RCT	n=497 (general population)	Online recruitment platform (Amazon Mechanical Turk)	August 4th-12th 2020	US	Policy: 'Opt-out' vaccination	Vignette describing a scenario in which approved influenza and COVID-19 vaccines were available. The response option was either pre-selected as no or yes, requiring participants to change the response if they did or did not want the vaccine, or there was no pre-selection.	No pre-selection	Intention	Vaccine acceptance	No effects	Good
7	8						Online experiment	n=485 (general population)	Online recruitment platform (Amazon Mechanical Turk)	September 12th-23rd 2020	US	Communications - content: Vaccine development Communications - presentation: Framing	1. Development timeline: 7-month or 12-month process 2. Safety: positive vs negative framing (95% vs 5% say safe / unsafe)	No additional comparison	Intention	Vaccine intention	1. 12-month process - positive effect 2. Positive framing - positive effect	Good
8	9	Freeman et al	2021	10.1016/S2468-2667(21)00096-7	Peer-reviewed	Effects of different types of written vaccination information on COVID-19 vaccine hesitancy in the UK (OCEANS-III): A single-blind, parallel-group, randomised controlled trial	Online RCT	n=16,455 (general population)	Market research company (Lucid)	January 19th - February 18th 2021	UK	Communications - content: Benefits of vaccination and Vaccine Development	Communicating information about the vaccine: 3 conditions on collective benefit - 1) collect benefit of not personally getting ill; 2) collective benefit of not transmitting to others; 3) combining the two 1 condition on personal benefit 1 condition on combined collective and personal benefit 1 condition on seriousness of the pandemic 2 conditions on safety concerns 1 combining benefit, safety an…	Control (NHS website information)	Intention	COVID-19 vaccine hesitancy scale	1. Overall - no main effects 2. For strongly hesitant group: positive effects of personal benefits, safety concerns, full combination	Good
9	10	Sprengholz et al	2021	10.1136/medethics-2020-107122	Peer-reviewed	Money is not everything: Experimental evidence that payments do not increase willingness to be vaccinated against COVID-19	Online RCT	n=1,349 (general population)	Not specified	November 2020	Germany	Policy: Monetary Incentive Communications - content: Benefits of vaccination	Communication condition: participants were told that a rapid uptake of the vaccine was important to decrease infections, avoid new waves and protect those who could not be vaccinated by reaching herd immunity Payment condition: 75% of participants were asked to imagine they were being financially rewarded for getting vaccinated (25, 50, 75, 100, 125, 150, 175, 200 euros)	Communication: being told that a vaccine would be approved shortly Payment: no payment mention	Intention	Likelihood of receiving the vaccine if they had the chance next month	No effects	Fair
10	11	Han et al	2021	10.2196/27832	Peer-reviewed	Communicating scientific uncertainty about the COVID-19 pandemic: Online experimental study of an uncertainty-normalizing strategy	Online RCT	n=1,497 (national sample of adults over 18)	Online recruitment platform (Qualtrics Online Panels)	May 7th - June 11th 2020	US	Communications - presentation: Uncertainty	4 manipulations of uncertainty: 1) uncertainty (of controllability, prognosis, severity of the pandemic) 2) uncertainty+uncertainty-normalising (emphasising the unknowability of the expected nature of scientified uncertainty) 3)uncertainity+hope-promoting (conveying optimism of future advances in knowledge and control over the pandemic) 4) uncertainty_prosocial (encouraging awareness of obligatio…	Control group with basic information about Covid-19	Intention	Likelihood of getting vaccinated	1. Overall - no efffect 2. Uncertainty - positive effect 3. Uncertainty normalising - positive effect	Good
11	12	Dai et al	2021	10.1101/2021.04.12.21254877	Pre-print	Behavioral nudges increase COVID-19 vaccinations: Two randomised controlled trials -	Field RCT	n=113,229 (patients registered at UCLA health)	Patients eligible to get vaccinated at UCLA Health in January-February 2021, including over 65s, patients with a transplant and high-risk patients with pre-qualifying pre-existing conditions	February 2021	US	Communications - delivery: Reminders Communications - presentation: Personalisation and Video	A text message reminder, with 4 type of text messages: 1) Simple text: UCLA Health: [Name], you can get the COVID-19 vaccine at UCLA Health. Make a vaccination appointment here: ____ 2) Ownership: [Name] a COVID-19 vaccine has just been made available to you at UCLA health. Claim your dose today by making a vaccine appointment here: 3) Simple text w/ video: adding this sentence into middle of sim…	No text message	Behaviour	Vaccine appointments scheduled within 6 days	1. Text message - positive effect 2. Ownership - positive effect compared to simple text 3. Video - no effect compared to simple text	Good
11	13						Field RCT	n=90,662 (patients registered at UCLA health)	Those from the previous experiment who had not registered for the vaccine within 8 days of the first reminder	February 2020	US	Communications - delivery: Reminders Communications - content: Benefits of Vaccination Communication - presentation: Personalisation	Second text message reminder, 6 types of text message: 1) Simple self: To protect yourself, make your COVID-19 vaccine appointment here today [link] 2) Simple prosocial: to protect your family, friends and community... 3) Early access self: you are one of the few Americans who have early access to the COVID-19 vaccine based on national guidelines. Take this opportunity to protect yourself 4) Earl…	No text message	Behaviour	Vaccine appointments scheduled within 6 days	1. Text message - positive effect 2. No difference between text messages	Foos
11	14						Online RCT	n=2,003	Online recruitment platforms (Amazon Mechanical Tyrk & Prolific)	February 2021	US	Communications - content: Personalisation Communications - delivery: Reminders Communications - presentation: Video	A text message reminder, with 4 type of text messages: 1) Simple text: UCLA Health: [Name], you can get the COVID-19 vaccine at UCLA Health. Make a vaccination appointment here: ____ 2) Ownership: [Name] a COVID-19 vaccine has just been made available to you at UCLA health. Claim your dose today by making a vaccine appointment here: 3) Simple text w/ video: adding this sentence into middle of sim…	No text message	Intention	Likelihood of scheduling a Covid-19 vaccination appointment	1. Video - positive effect 2. Ownership - no effect	Good
12	15	Batteux et al	2021	10.1101/2021.02.28.21252616	Pre-print	The negative consequences of failing to communicate uncertainties during a pandemic: The case of COVID-19 vaccines	Online RCT	n=328 (general population)	Online recruitment platform (Prolific)	November 2020	UK	Communications - presentation: Unertainty	1) Vaccine announcement in the news stating that a vaccine will soon be available and manipulating the certainty of effectiveness: Certain Condition: 60% effectiveness, verbal qualifiers of certainty. Uncertain Condition: 50% to 70% effective, verbal qualifiers of uncertainty. 2) After these messages, participants read another scenario saying that a week later a vaccine is available but specifies…	No additional comparison (certain vs uncertain)	Intention	Likelihood of receiving the vaccine	1. Uncertainty vs certainty condition a positive effect after the second vaccine announcement (i.e. conflicting information)	Fair
13	16	Serra-Garcia & Szech	2021	CESifo link	Grey Literature	Choice architecture and incentives increase COVID-19 vaccine intentions and test demand	Online experiment	N=1,040 (targetting and achieving 34% Black participants)	Online recruitment platform (Prolific)	December 2020 - February 2021	US	Policy: 'Opt-out' Vaccination and Monetary Incentives	Defaults: opt-out, participants were asked whether they would take the vaccine if an appointment had been scheduled for them to receive it; opt-in pparticipants were asked whether they wanted to receive it Compensation: there was either no compensation or 1 of 8 compensation amounts ranging from $0 to $500	Defaults: no additional comparison Compensation: no compensation	Intention	Vaccine intention	1. Opt-out default - positive effect 2. High compensation - positive effect 3. Low compensation - negative effect	Good
14	17	Sinclair & Agerström	2021	10.1080/10410236.2021.1937832	Peer-reviewed	Do social norms influence young people's willingness to take the COVID-19 vaccine?	Online RCT	n=654 (18-30 adults)	Online recruitment platform (Prolific)	December 2020	UK	Communications - content: Social norm and Effecitveness and safety	Information-based social norm manipulation where either: (1) 85% of people plan to take the vaccine (2) 45% of people plan to take the vaccine (3) 85% of young people plan to take the vaccine (4) 45% of young people plan to take the vaccine (5) NHS declares the vaccine is safe and effective	No information	Intention	Vaccine intention	1. Higher norm vs weaker norm - positive effect 2. Higher norm vs NHS - no effect 3. Higher norm vs control - no effect 4. Norm group (young vs general) - no effect	Good
15	18	Sprengholz et al	2021	10.1111/aphw.12285	Peer-reviewed	Reactance revisited: Consequences of mandatory and scarce vaccination in the case of COVID-19	Online RCT	n=973 (general population)	Not specified	December 2020	Germany	Policy: Mandatory vaccination and prioritising vaccination	Information is provided where either (1) vaccination unrestricted (2) vaccination mandatory with fine for non-compliance (3) vaccination scarce and only available in 2022	No additional comparison	Intention	Psychological reactance	1. Mandatory vaccination - negative effect on those with low vaccine intentions 2. Scarcity - negative effect on those with high vaccine intentions	Fair
15	19						Online RCT	n=1,701 (groups not yet offered the vaccine, i.e. below 60s, without chronic condition or health professional)	Online recruitment platform (Prolific)	January 2021	US	Policy: Mandatory vaccination and prioritising vaccination	Information is provided where either (1) vaccination unrestricted (2) vaccination mandatory with fine for non-compliance (3) vaccination scarce and only available in 2022	No additional comparison	Intention	Psychological reactance Intention to avoid COVID-19 vaccine	1. Mandatory vaccination - negative effect on those with low vaccine intentions 2. Scarcity - negative effect on those with high vaccine intentions	Good
16	20	Kobayashi et al	2021	10.1101/2021.05.26.21257854	Pre-print	Corowa-kun: Impact of a COVID-19 vaccine information chatbot on vaccine hesitancy, Japan 2021	Cross-sectional	n=10,192 (general population)	Users of on messenger app, advertised through national media	February-April 2021	Japan	Communications - delivery: Chatbot	Free chatbot providing instant, automated answers to frequently asked COVID-19 vaccine questions, via the most popular messenger app in Japan	None	Intention	Vaccination intentions	Positive effect	Poor
17	21	Craig	2021	10.1007/s40271-021-00508-0	Peer-reviewed	United States COVID-19 vaccination preferences (CVP): 2020 Hindsight	Discrete choice experiment (DCE)	n=1,153 (general population)	Marketing panel (Dynata)	November 9-11th 2020	US	Communications - content: Effectiveness and safety Delivery: immunity Policy: Proof of vaccination Vaccination Delivery: Setting	Each choice presented to participants varied: (1) Duration of immunity: (a) 3 months, (b) 6 months (2) Proof of vaccination: (a) vaccination card, (b) none (3) Setting: (a) medical, (b) community (4) Risk of severe side effects: (a) moderate risk (1 in 1,000) (b) low risk (1 in 10,000), (c) very low risk (1 in 100,000), (d) lowest risk (1 in 1,000,000) (5) Vaccine effectiveness: (a) 50% effective…	No additional comparison	Intention	Choice between vaccination options or no vaccination	1. Duration of immunity: negative effect of decreasing duration. 2. Proof of vaccination: negative effect of no proof of vaccination among those who want a vaccine, no effect for those who don't 3. Setting: among those who prefer a medical setting, negative effect of community setting and vice versa for those who prefer a community setting 4. Side effects: negative effect of increasing risk of si…	Good
18	22	Palm et al	2021	10.3389/fpos.2021.661257	Peer-reviewed	The effect of frame on COVID-19 vaccine resistance	Online RCT	n=1,123 (general population)	Online recruitment platform (Amazon Mechanical Turk)	August 2020	US	Communications - content: Effectiveness and safety; Social norms and Vaccine development Communications - presentation: Messenger	News story which was about either: (1) vaccines being safe and effective (2) vaccines not being safe or effective (3) others being willing to get vaccinated (4) others being unwiling to get vaccinated (5) liberal mandatory agenda (6) Trump pushes for rapid approval	No information	Intention	Likelihood of getting vaccinated	1. Safe and effective - positive effect 2. Unsafe and ineffective - no effect 3. Others being willing to get vaccinated - positive effect 4. Others being unwiling to get vaccinated - negative effect 5. Liberal mandatory agenda - no effect 6. Trump pushes for rapid approval - negative effect	Good
19	23	Kerr et al	2021	10.3390/vaccines9040379	Peer-reviewed	Effect of information about COVID-19 vaccine effectiveness and side-effects on behavioural intentions: Two online experiments	Online RCT	n=2,488 (general population)	Online recruitment platforms (Respondi & Prolific)	January 13-17th 2021	UK	Communications - content: Effectiveness and safety	Information about COVID-19 vaccines, which was either: (1) factbox about effectiveness and side effects (2) Q&A about effectiveness and side effects (3) approval process details (4) explanation of immunity mechanism	No information	Intention	Vaccine hesitancy (Oxford COVID-19 Vaccine Hesitancy Scale) Vaccination intention	No effects	Good
19	24						Online RCT	n=2,217 (general population)	Online recruitment platform (Respondi)	January 28th - February 1st 2021	UK	Communications - presentation: Unertainty	Information about COVID-19 vaccines manipulating certainty relating to efficacy and safety and the need for caution, which were either (1) low caution, (2) medium caution or (3) high caution	No additional comparison	Intention	Vaccine hesitancy (Oxford COVID-19 Vaccine Hesitancy Scale) Vaccination intention	No effects	Good
20	25	Trueblood et al	2021	10.1177/1948550621999622	Peer-reviewed	The role of risk preferences in response to messaging about COVID-19 vaccine take-up	Online RCT (Study 2)	n=1,003 (general population)	Online recruitment platform (Amazon Mechanical Turk)	July 2020	US	Communications - content: Effectiveness and Safety; Herd immunity	Information provided about the vaccine approval process, side effects and efficacy, along with either: (1) favourable efficacy comparison to flu (2) necessary coverage rate of vaccination to achieve herd immunity (3) both flu comparison and coverage rate	Information about the vaccine approval process, side effects and efficacy	Intention	When would be willing to get vaccinated (immediately to never)	1. Flu comparison - no effect 2. Necessary coverage - positive effect 3. Flu comparison and coverage rate - no effect	Good
21	26	Motta et al	2021	10.3389/fpos.2021.630133/full	Peer-reviewed	Encouraging COVID-19 vaccine uptake through effective health communication	Online RCT	n=7,064 (general population)	Online recruitment panel (Lucid Theorem)	July 8th-20th 2020	US	Communications - presentation: Messenger Communications - content: Benefits of vaccination and Vaccine development	Read a short newspaper opinion piece about the importance of receiving a COVID-19 vaccine, which manipulated: (1) frame: (a) personal health risks, (b) collective public health consequences of not vaccinating, (c) economic costs of not vaccinating (2) message source: (a) lay, (b) expert (3) pre-bunking information highlighting the rigors of clinical trials: (a) included, (b) not included	Unrelated news story	Intention	Likelihood of getting vaccinated	1. Personal frame - positive effect 2. Collective frame - positive effect 3. Economic frame - no effect 4. Message source - no effect 5. No pre-bunking - positive effect 6. Pre-bunking - no effect	Fair
22	27	McPhedran et al	2021	Research Square Link	Pre-print	Location, location, location: A discrete choice experiment to inform vaccination programme delivery in the UK	Discrete choice experiment (DCE)	n=2,012 (18-29 year olds, unvaccinated)	Online access panel (LifePoints, Kantar)	March 25th - April 2nd 2021	UK	Delivery: Setting, Proximity, Appointments Communications - presentation: Messenger	Each choice presented to participants varied: (1) Mode of delivery: (a) local vaccination centre, (b) nearby GP surgery, (c) nearby pharmacy, (d) drive-thru, (e) mobile/pop up (2) Appointment time: (a) Monday to Friday 9-5, (b) Monday to Friday after hours, (c) Weekends (3) Proximity from one's home: (a) Less than 15 minutes, (b) 15-30 minutes, (c) 30-45 minutes (4) SMS invitation reminder: (a) N…	No additional comparison	Intention	Choice between vaccination options or no vaccination	1. Mode of delivery - GP surgery preferred, pharmacy and drive-thru least preferred 2. Location proximity - 15-30min preferred, 30-45min least preferred 3. Appointment time - appointment afters hours in the week least preferred 4. Invitation source - from one's best friend least preferred	Good
23	28	Sprengholz et al	2021	10.31234/osf.io/hfm43	Pre-print	Payments and freedoms: Effects of monetary and legal incentives on COVID-19 vaccination intentions in Germany	Online experiment	n=997 (general population)	Not specified	April 20th-21st 2021	Germany	Policy: Legal and Monetary Incentives	The experiment had two manipulations: (1) Legal incentive: (a) increased freedom after vaccination, (b) no increased freedom (between-subjects) (2) Monetary incentive: choices between not getting vaccinated vs getting vaccinated and paid a specific amount (between 0 and 10,000 euros) (within-subjects)	No additional comparison	Intention	Choice between vaccination and no vaccination	1. Legal incentive - no effect. 2. Monetary incentive - positive effect from 3,250 euros onwards.	Good
24	29	Pink et al	2021	10.31234/osf.io.f9jq5	Pre-print	Elite party cues increase vaccination intentions among republicans	Online RCT	n=1,480 (general population identifying as Republican or leaning Republican)	Online recruitment platforms (CloudResearch, Bovitz, Amazon Mechanical Turk)	March 17th-24th 2021	US	Communications - Presentation: Meseenger	A video and short essay endorsing vaccination by either (1) Republicans or (2) Democrats	A video and short essay on an unrelatic topic	Intention	Vaccination intentions	Republication positive effect for unvaccinated participants	Good
25	30	Moehring et al	2021	10.31234.osf.io/srv6t	Pre-print	Surfacing norms to increase vaccine acceptance	Online RCT	n=437,236 (general population)	Not specified	October 2020	23 countries (including UK)	Communications - Content: Social norms	Received accurate information about how previous respondents in their country had answered a survey question about vaccine acceptance. This information was either (1) narrow social norm, i.e. % of people who say they will take the vaccine (who answered yes to the survey), (2) broad social norm, i.e. % of people who say they might take the vaccine (who answered yes or don't know to the survey)	Receiving the information after vaccine acceptance is measured	Intention	Vaccine acceptance	Positive effects	Good
26	31	Behavioural Insights Team	2021	BIT Link	Grey Literature	Practicalities are the most significant impediments to people getting a COVID vaccine - and the easiest to address	Online experiment	n=4,085 (general population adults)	Not specified	Not specified	UK	Delivery: Setting, Proximity, Appointments and Waiting time	1. Setting 1: mass-vaccine centre vs local GP 2. Travel time: 1 hour vs 10 minutes 3. Setting 2: vaccination site vs healthcare professional come to house 4. Booking: book a specific slot vs walking-in 5. Time: some point during the day but you don't know until the day vs choosing a time slot of your choice	No additional comparison	Intention	Choosing Option A (getting the vaccine sooner with more hassle) vs Option B (getting a vaccine later with less hassle)	1. Local GP - positive effect 2. 1 hour - negative effect 3. Can't choose a time - negative effect	Fair
27	32	Davis et al	2021	10.1111/bjhp.12546	Peer-reviewed	Efficacy information influences intention to take COVID-19 vaccine	Online RCT	n=481 (individuals with intermediate levels of vaccine hesitancy)	Online recruitment platform (Prolific)	December 12th-17th 2020	UK	Communications - content: Effectiveness and safety	Information conditions: 1) COVID-19 Vaccine information 2) COVID-19 + Flu information with 60% efficacy (of flu vaccine) 3) COVID-19 + Flu information with 40% efficacy (of flu vaccine)	No information	Intention	Vaccine intention	1. COVID-19 Vaccine information - positive effect 2. COVID-19 + Flu information with 40% efficacy - stronger positive effect	Good
28	33	Taber et al	2021	10.31234/osf.io/ux73h	Pre-print	Experimental Tests of How Hypothetical Monetary Lottery Incentives Influence Vaccine-Hesitant U.S Adults Intentions to Vaccinate	Online RCT	n = 589 (unvaccinated US adults)	Online recruitment platform (Prolific)	16th May - 19th May 2021	US	Policy: Monetary Incentives	12 conditions varying the monetary amount and number of winners, holding constant a total payment of $5 million - ranging from 500,000 people win $10 to 1 person wins $5 million	No additional comparison	Intention	Vaccine intention	1. Overall - no effect 2. Positive effect on those who perceive themselves as more likely to win and would anticipate greater regret	Good
28	34						Online RCT	n = 274 (unvaccinated US adults)	Online recruitment platform (Prolific)	17th May - 19th May 2021	US	Communications - presentation: Framing and Nuemerical format	Gain frame: If your name is chosen and you are vaccinated, you win the money Loss frame: If your name is chosen but you are not vaccinated, you cannot win the money Numeric frame: 5 total winnders vs 1 winner for each of the 5 weeks	No additional comparison	Intention	Vaccine intention	No effects	Good
29	35	Duch et al	2021	10.1101/2021.07.26.21250865	Pre-print	Cash versus Lotteries: COVID-19 Vaccine Incentives Experiment*	Online RCT	n = 1628 (unvaccinated US adults)	Online recruitment platforms (Cloud Research's Prime Panels; Facebook adverts; Lucid Fulcrum Exchange)	28th June - 11th July 2021	US	Communications - delivery; Video Policy: Monetary Incentives	Informational video promoting vaccination messages: 1: Being entered into a lottery to win over $1 million if you get vaccinated 2: Receiving cash equivalent vouchers where you can earn up to $100 that can be spent in store or online	Health benefits of COVID-19 vaccine message	Intention	Digital expression of further interest in vaccination information	1. Lottery: no effect 2. Cash: positive effect	Good
30	36	Santos et al	2021	10.1001/jamanetworkopen.2021.18702	Peer-reviewed	Effect of Targeted Behavioral Science Messages on COVID-19 Vaccination Registration Among Employees of a Large Health System: A Randomized Trial	Field RCT	n = 9723 (healthcare workers who had not scheduled a COVID-19 vaccination)	Geisinger Health System employee s	2021-01-01	US	Communications - content: Social norms and Effectiveness and safety	Email to employees: 1: Social norms - more than 11 million americans have received a COVID-19 vaccine. This includes more than 14,000 of your Geisinger colleaugues - including more than 80% of providers like me - and more are already scheduled 2: Re-framing risks - I understand that you may be concerned about side-effects of the vaccines. Mild side effects, like headache, soreness and low-grade f…	Delayed control	Behaviour	Registration on the vaccination scheduling portal during the 3 days after intervention	1. Social norms - positive effect 2. Re-framing risk - positive effect	Fair
31	37	Barber & West	2021	10.2139/ssrn.3894034	Pre-print	Conditional Cash Lotteries Increase COVID-19 Vaccination Rates	Quasi-experimental	Vaccination rates	Data from US Centers for Disease Control and Prevention	19th February 2021 - 11th May 2021	US	Policy: Monetary Incentive	Introduction of a statewide financial incentive programme in Ohio	Synthetic control	Behaviour	First dose vaccination rates	Positive effect	Good
32	38	Walkley et al	2021	10.1001/jama.2021.11048	Peer-reviewed	Lottery-Based Incentive in Ohio and COVID-19 Vaccination Rates	Quasi-experimental	Vaccination rates	Data from the Centers for Disease Control and Prevention COVID-19 Vaccine Tracker	15th April - 12th May 2021 and then 13th May - 9th June 2021	US	Policy: Monetary Incentives	Introduction of a statewide financial incentive programme in Ohio	Control composed of 14 days before the incentive programme was introduced and other states without an incentive programmes	Behaviour	Number of daily adult vaccination rates per 100,000 individuas	No effect	Good
33	39	Thirumurthy et al	2021	10.2139/ssrn.3912786	Pre-print	Association Between Statewide Financial Incentive Programs and COVID-19 Vaccination Rates	Quasi-experimental	Vaccination rates	Data from from the National Governors' Association and Google News	1st April - 29th July 2021	US	Policy: Monetary Incentives	Financial incentive programme	States with no incentive programme	Behaviour	Number of vaccine doses administered daily per 100,000 individuals in each state	No effect	Fair
