# Supplementary material for: The Effectiveness of Interventions for Increasing COVID-19 Vaccine Uptake: A Systematic Review
Source: Vaccines (Basel). 2022 Mar 3;10(3):386. doi: 10.3390/vaccines10030386 (PMC8949230; doi:10.3390/vaccines10030386)
Supplement: Supplementary file 1 [file vaccines-10-00386-s001.zip › vaccines-1584862-supplementary Table S2-Search terms.xlsx]

## Sheet: Sheet1
	Embase	Medline	PsycINFO	Psychology and Behavioral Science Collection	Web of Science	NIH Preprints Portfolio
Covid-19	exp severe acute respiratory syndrome coronavirus 2/	exp SARS-CoV-2/	*coronavirus/	DE "CORONAVIRUSES"
	coronavirus disease 2019/	exp COVID-19		DE "COVID-19 pandemic"
	experimental coronavirus disease 2019/			DE "CORONAVIRUS diseases" OR DE "COVID-19" OR DE "MIDDLE East respiratory syndrome" OR DE "SARS (Disease)" OR DE "COVID-19" OR DE "POST-acute COVID-19 syndrome"
	exp "SARS-CoV-2 (clinical isolate Wuhan/Hu-1/2019)"/			DE "SARS-CoV-2"
	(corona* adj1 (virus* or viral*)).tw,kw.	((corona* or corono*) adj1 (virus* or viral* or virinae*)).tw,kw,kf.	(corona* adj1 (virus* or viral*)).tw,kw.	(corona* N1 (virus* or viral*))	(corona* NEAR/1 (virus* or viral*))
	(CoV not (Coefficien* or co-efficien* or covalent* or covington or covariant* or covarianc* or "cut-off value*" or "cutoff value*" or "cut-off volume*" or "cutoff volume*" or "combined optimi?ation value*" or "central vessel trunk" or CoVR or CoVS)).tw,kw.	(CoV not (Coefficien* or "co-efficien*" or covalent* or Covington* or covariant* or covarianc* or "cut-off value*" or "cutoff value*" or "cut-off volume*" or "cutoff volume*" or "combined optimi?ation value*" or "central vessel trunk*" or CoVR or CoVS)).tw,kw,kf.	(CoV not (Coefficien* or co-efficien* or covalent* or covington or covariant* or covarianc* or "cut-off value*" or "cutoff value*" or "cut-off volume*" or "cutoff volume*" or "combined optimi?ation value*" or "central vessel trunk" or CoVR or CoVS)).tw,kw.	CoV	(CoV not (Coefficien* or co-efficien* or covalent* or covington or covariant* or covarianc* or "cut-off value*" or "cutoff value*" or "cut-off volume*" or "cutoff volume*" or "combined optimi?ation value*" or "central vessel trunk" or CoVR or CoVS))
	(coronavirus* or 2019nCoV* or 19nCoV* or "2019 novel*" or Ncov* or "n-cov" or "SARS CoV-2*" or "SARSCoV-2*" or SARSCoV2* or "SARS-CoV2*" or "severe acute respiratory syndrome*" or COVID*2).tw,kw.	(coronavirus* or 2019nCoV* or 19nCoV* or "2019 novel*" or Ncov* or "n-cov" or "SARS-CoV-2*" or "SARSCoV-2*" or SARSCoV2* or "SARS-CoV2*" or "severe acute respiratory syndrome*" or COVID*2).tw,kw,kf.	(coronavirus* or 2019nCoV* or 19nCoV* or "2019 novel*" or Ncov* or "n-cov" or "SARS CoV-2*" or "SARSCoV-2*" or SARSCoV2* or "SARS-CoV2*" or "severe acute respiratory syndrome*" or COVID*2).tw,kw.	(coronavirus* or 2019nCoV* or 19nCoV* or "2019 novel*" or Ncov* or "n-cov" or "SARS CoV-2*" or "SARSCoV-2*" or SARSCoV2* or "SARS-CoV2*" or "severe acute respiratory syndrome*" or COVID*2)	(coronavirus* or 2019nCoV* or 19nCoV* or "2019 novel*" or Ncov* or "n-cov" or "SARS CoV-2*" or "SARSCoV-2*" or SARSCoV2* or "SARS-CoV2*" or "severe acute respiratory syndrome*" or COVID*2)
vaccine uptake	exp SARS-CoV-2 vaccine/	exp COVID-19 Vaccines/		DE "COVID-19 vaccines"
	*vaccination/	exp *Vaccination/
	*mass immunization/	exp *Immunization/	*immunization/	DE "IMMUNIZATION"
		exp *Immunization Programs
	((vaccination or immuni?ation) adj1 (program* or campaign*))	((vaccination or immuni?ation) adj1 (program* or campaign*))	((vaccination or immuni?ation) adj1 (program* or campaign*))	((vaccination or immuni?ation) N1 (program* or campaign*))	((vaccination or immuni?ation) NEAR/1 (program* or campaign*))	vaccination AND interventions AND uptake
	vaccin* adj3 (intention* or intend* or uptake or behavio?r* or decision* or acceptab*)	vaccin* adj3 (intention* or intend* or uptake or behavio?r* or decision* or acceptab*)	vaccin* adj3 (intention* or intend* or uptake or behavio?r* or decision* or acceptab*)	vaccin* N3 (intention* or intend* or uptake or behavio?r* or decision* or acceptab*)	(vaccin* NEAR/3 (intention* or intend* or uptake or behavio?r* or decision* or acceptab*))	vaccination AND intentions
interventions	intervention*	intervention*	intervention*	intervention*	intervention*
	persuasive communication/	persuasive communication/	exp *communication/	DE "COMMUNICATION"
	*public health message/
	language or message* or persuade* or persuasive	language or message* or persuade* or persuasive	language or message* or persuade* or persuasive	language or message* or persuade* or persuasive	language or message* or persuade* or persuasive
	remov* adj1 barrier*	remov* adj1 barrier*	remov* adj1 barrier*	remov* N1 barrier*	remov* NEAR/1 barrier*
	*social norm/	*Social Norms/		DE "SOCIAL norms"
	social adj1 (norm or norms)	social adj1 (norm or norms)	social adj1 (norm or norms)	social N1 (norm or norms)	social NEAR/1 (norm or norms)
	normative	normative	normative	normative	normative
			*social influences/
	(peer* or family or social) adj2 influence*	(peer* or family or social) adj2 influence*	(peer* or family or social) adj2 influence*	DE "SOCIAL influence" OR DE "ATTITUDE change (Psychology)" OR DE "CONFORMITY" OR DE "IDENTIFICATION (Psychology)" OR DE "IMITATION" OR DE "MOTION pictures -- Influence of" OR DE "PEER pressure" OR DE "PERSUASION (Psychology)" OR DE "POLARIZATION (Social sciences)" OR DE "PROPAGANDA" OR DE "SOCIAL bonds" OR DE "SOCIAL judgment theory (Communication)"	(peer* or family or social) NEAR/2 influence*
	*social behavior/ or altruism/ or beneficence/ or care behavior/ or community participation/ or social attitude/ or social responsibility/	*Social Behavior/	exp *prosocial behavior/	DE "PROSOCIAL behavior"
		exp *Social Responsibility/
		*Altruism/		DE "ALTRUISM"
	altruis*	altruis*	altruis*	altruis*	altruis*
	"trust in" or trusted	"trust in" or trusted	"trust in" or trusted	"trust in" or trusted	"trust in" or trusted
	*behavior change/	*health behavior/ or health risk behaviors/	exp *behavior change/	DE "BEHAVIOR"
	behavio?r* adj1 (change* or prosocial or pro-social)	behavio?r* adj1 (change* or prosocial or pro-social)	behavio?r* adj1 (change* or prosocial or pro-social)	behavio?r* N1 (change* or prosocial or pro-social)	(behavio?r* NEAR/1 (change* or prosocial or pro-social))
	exp *health care access/	exp *Health Services Accessibility/	exp *health care access/	DE "HEALTH services accessibility" OR DE "MEDICAL care wait times"
	access* or convenien* or availab*	access* or convenien* or availab*	access* or convenien* or availab*	access* or convenien* or availab*	(access* or convenien* or availab*)
