# Supplementary material for: The Effectiveness of Interventions for Increasing COVID-19 Vaccine Uptake: A Systematic Review
Source: Vaccines (Basel). 2022 Mar 3;10(3):386. doi: 10.3390/vaccines10030386 (PMC8949230; doi:10.3390/vaccines10030386)
Supplement: Supplementary file 1 [file vaccines-10-00386-s001.zip › vaccines-1584862-supplementary Table S4-Risk of bias.xlsx]

## Sheet: RCT & Experimental (no control)
			Randomisation		Blinding			Characteristics	Drop out		Adherence	Background	Outcomes	Power	Preplanning	Assignment
Study #	Authors	Year	Criteria 1	Criteria 2	Criteria 3	Criteria 4	Criteria 5	Criteria 6	Criteria 7	Criteria 8	Criteria 9	Criteria 10	Criteria 11	Criteria 12	Criteria 13	Criteria 14	Rating
22	Palm et al	2021	No	NR	NR	Yes	NR	NR	NR	NR	Yes	CD	Yes	NR	NR	NA	Good
23	Kerr et al	2021	No	Yes	Yes	Yes	NR	NR	Yes	NR	Yes	CD	Yes	Yes	Yes	NA	Good
24	Kerr et al	2021	No	Yes	Yes	Yes	NR	NR	Yes	NR	Yes	CD	Yes	Yes	Yes	NA	Good
25	Trueblood et al	2021	No	NR	NR	Yes	NR	NR	Yes	NA	Yes	CD	Yes	NR	NR	NA	Good
26	Motta et al	2021	No	NR	NR	Yes	NR	Yes	NR	NR	Yes	CD	Yes	NR	NR	Yes	Fair
28	Sprengholz et al	2021	No	NR	NR	Yes	NR	NR	No	NR	Yes	CD	Yes	NR	NR	NA	Good
29	Pink et al	2021	No	NR	NR	Yes	NR	NR	NR	NR	Yes	CD	Yes	NR	Yes	NA	Good
30	Moehring et al	2021	Yes	NR	NR	Yes	NR	NR	NR	NR	Yes	CD	Yes	NR	Yes	NA	Good
32	Davis et al	2021	No	NR	NR	Yes	NR	NR	NR	No	Yes	CD	Yes	No	Yes	NA	Good
33	Taber et al	2021	No	NR	NR	Yes	NR	Yes	Yes	Yes	Yes	CD	Yes	Yes	No	NA	Good
34	Taber et al	2021	No	NR	NR	Yes	NR	NR	Yes	Yes	Yes	CD	Yes	Yes	No	NA	Good
35	Duch et al	2021	Yes	Yes	Yes	Yes	Yes	Yes	Yes	Yes	Yes	CD	Yes	Yes	Yes	NA	Good
2	Witus & Larson	2021	Yes	Yes	Yes	Yes	NR	NR	No	Yes	Yes	CD	Yes	NR	NR	Yes	Fair
3	Chen et al	2021	No	Yes	Yes	Yes	NR	NR	Yes	NR	Yes	CD	Yes	NR	NR	Yes	Good
4	Berliner-Senderey et al	2021	No	NR	NR	Yes	NR	Yes	Yes	Yes	Yes	CD	No	NR	NR	Yes	Fair
6	Thorpe et al	2021	No	Yes	Yes	Yes	NR	NR	No	NR	Yes	CD	Yes	NR	Yes	Yes	Good
7	Strickland et al	2021	No	Yes	Yes	Yes	NR	No	NR	NR	Yes	CD	Yes	NR	No	Yes	Good
8	Strickland et al	2021	No	Yes	Yes	Yes	NR	No	NR	NR	Yes	CD	Yes	Yes	Yes	Yes	Good
9	Freeman et al	2021	Yes	Yes	Yes	Yes	Yes	Yes	Yes	Yes	Yes	CD	Yes	Yes	Yes	Yes	Good
10	Sprengholz et al	2021	No	NR	NR	NR	NR	NR	NR	NR	Yes	CD	Yes	NR	NR	Yes	Fair
11	Han et al	2021	No	Yes	Yes	Yes	NR	NR	Yes	Yes	Yes	CD	Yes	NR	NR	Yes	Good
36	Santos et al	2021	Yes	Yes	Yes	Yes	NR	NR	Yes	Yes	Yes	CD	Yes	NR	Yes	Yes	Fair
21	Craig	2021	No	Yes	Yes	Yes	NR	Yes	No	NR	Yes	CD	Yes	NR	Yes	Yes	Good
12	Dai et al	2021	Yes	Yes	NR	NR	NR	NR	Yes	Yes	Yes	CD	Yes	NR	Yes	Yes	Good
13	Dai et al	2021	Yes	Yes	NR	Yes	NR	NR	Yes	Yes	Yes	CD	Yes	NR	Yes	Yes	Good
14	Dai et al	2021	Yes	Yes	Yes	Yes	NR	NR	Yes	Yes	Yes	CD	Yes	NR	Yes	Yes	Good
15	Batteux et al	2021	No	Yes	NR	NR	NR	NR	NR	NR	Yes	CD	Yes	Yes	Yes	Yes	Fair
16	Serra-Garcia & Szech	2021	No	Yes	Yes	Yes	NR	NR	Yes	Yes	Yes	CD	Yes	Yes	Yes	Yes	Good
17	Sinclair & Agerstrom	2021	No	Yes	Yes	Yes	NR	NR	Yes	Yes	Yes	CD	Yes	Yes	Yes	Yes	Good
18	Sprengholz et al	2021	No	Yes	NR	NR	NR	Yes	NR	NR	Yes	CD	Yes	NR	Yes	Yes	Fair
19	Sprengholz et al	2021	No	Yes	NR	NR	NR	Yes	NR	NR	Yes	CD	Yes	Yes	Yes	Yes	Good

## Sheet: Cross-sectional
			Objective	Population	Participation	Recruitment	Power	Pre-measures	Timeframe	Exposure	Manipulation	Follow up	Outcomes	Blinding	Drop out	Confounds
Study #	Authors	Year	Criteria 1	Criteria 2	Criteria 3	Criteria 4	Criteria 5	Criteria 6	Criteria 7	Criteria 8	Criteria 9	Criteria 10	Criteria 11	Criteria 12	Criteria 13	Criteria 14	Rating
20	Kobayashi et al	2021	No	Yes	No	Yes	No	No	Yes	N/A	Yes	No	Yes	No	N/A	Yes	Poor
1	Bateman et al	2021	Yes	Yes	Yes	Yes	No	No	Yes	No	Yes	No	Yes	No	NA	No	Poor
5	Yuen et al	2021	Yes	Yes	No	NR	Yes	No	Yes	NA	Yes	No	Yes	NR	NA	Yes	Good
31	Behavioural Insights Team	2021	Yes	Yes	NA	NR	No	No	NA	Yes	Yes	No	Yes	NR	NR	No	Fair
27	McPhedran	2021	Yes	Yes	NA	Yes	Yes	No	NA	Yes	Yes	No	Yes	NR	NR	No	Good

## Sheet: Case Control (quasi-experiments
			Objective	Eligibility	Sample size	Representative		Intervention	Recruitment		Case Exposure		Blinding	Analysis
Study #	Authors	Year	Criteria 1	Criteria 2	Criteria 3	Criteria 4	Criteria 5	Criteria 6	Criteria 7	Criteria 8	Criteria 9	Criteria 10	Criteria 11	Criteria 12	Rating
37	Barber & West	2021	Yes	Yes	No	Yes	Yes	Yes	NA	NA	Yes	Yes	NA	Yes	Good
38	Walkley et al	2021	Yes	Yes	No	Yes	Yes	Yes	NA	NA	Yes	Yes	NA	Yes	Good
39	Thirumurthy et al	2021	Yes	Yes	No	Yes	Yes	Yes	NA	NA	Yes	Yes	NA	No	Fair
